# Supplementary material for: Immunosuppression as a Hallmark of Critical COVID-19: Prospective Study
Source: MDPI journal article supplement (doi:10.3390/cells10061293), 2021-05-23
Supplement: s1 [file s1]

**Table S1.** Changes in the counts of lymphocyte subpopulations during SARS-CoV-2 infection in non-ICU versus ICU COVID-19 patients.

| Lymphocyte subsets                                                       | On admission | Day 7 | Day 12 |
|--------------------------------------------------------------------------|--------------|-------|--------|
| Helper T cells (CD3+CD4+)/μL in non-ICU                                  | 497          | 657   | 565    |
| Helper T cells (CD3+CD4+)/μL in ICU                                      | 292          | 307   | 396    |
| p                                                                        | *            | *     |        |
| Suppressor T cells (CD3+CD8+)/μL in non-ICU                              | 250          | 283   | 319    |
| Suppressor T cells (CD3+CD8+)/μL in ICU                                  | 119          | 167   | 245    |
| p                                                                        | *            | *     |        |
| Naïve helper T cells (CD3+CD4+CD45RA+)/μL in non-ICU                     | 261          | 338   | 321    |
| Naïve helper T cells (CD3+CD4+CD45RA+)/μL in ICU                         | 163          | 156   | 200    |
| p                                                                        | *            | *     |        |
| Naïve suppressor T cells (CD3+CD8+CD45RA+)/μL in non-ICU                 | 180          | 201   | 351    |
| Naïve suppressor T cells (CD3+CD8+CD45RA+)/μL in ICU                     | 86           | 120   | 153    |
| p                                                                        | *            | *     |        |
| Activated T cells (CD3+HLA-DR+)/μL in non-ICU                            | 43           | 67    | 39     |
| Activated T cells (CD3+HLA-DR+)/μL in ICU                                | 66           | 90    | 131    |
| p                                                                        | *            |       | *      |
| Activated suppressor T cells (CD3+CD8+HLA-DR+)/μL in non-ICU             | 23           | 30    | 20     |
| Activated suppressor T cells (CD3+CD8+HLA-DR+)/μL in ICU                 | 38           | 58    | 94     |
| p                                                                        |              |       | *      |
| Regulatory T cells (CD3+CD4+CD25+CD127low+)/μL in non-ICU                | 33           | 48    | 37     |
| Regulatory T cells (CD3+CD4+CD25+CD127low+)/μL in ICU                    | 19           | 18    | 18     |
| p                                                                        | *            | *     |        |
| Naïve regulatory T cells (CD45RA+CD3+CD4+CD25+CD127low+)/μL in non-ICU   | 7,6          | 11    | 11     |
| Naïve regulatory T cells (CD45RA+CD3+CD4+CD25+CD127low+)/μL in ICU       | 3            | 2,7   | 2,9    |
| p                                                                        | *            | *     | *      |
| Induced regulatory T cells (CD45RO+CD3+CD4+CD25+CD127low+)/μL in non-ICU | 25           | 35    | 25     |
| Induced regulatory T cells (CD45RO+CD3+CD4+CD25+CD127low+)/μL in ICU     | 16           | 15    | 14     |
| p                                                                        | *            | *     |        |
| TCRα/β/μL in non-ICU                                                     | 727          | 924   | 861    |
| TCRα/β/μL in ICU                                                         | 406          | 467   | 627    |
| p                                                                        | *            | *     |        |
| TCRγ/δ/μL in non-ICU                                                     | 42           | 43    | 57     |
| TCRγ/δ/μL in ICU                                                         | 9            | 13    | 16     |
| p                                                                        | *            | *     |        |
| B cells (CD19+CD20+)/μL in non-ICU                                       | 387          | 490   | 297    |
| B cells (CD19+CD20+)/μL in ICU                                           | 236          | 235   | 325    |
| p                                                                        | *            | *     |        |
| NK cells (CD16+CD56+)/μL in non-ICU                                      | 171          | 194   | 87     |
| NK cells (CD16+CD56+)/μL in ICU                                          | 52           | 50    | 85     |
| p                                                                        | *            | *     |        |

\* statistical significance ( $p<0.05$ ) between studied groups
