# Supplementary material for: Immunosuppression as a Hallmark of Critical COVID-19: Prospective Study
Source: MDPI journal article supplement (doi:10.3390/cells10061293), 2021-05-23
Supplement: s1 [file s1]

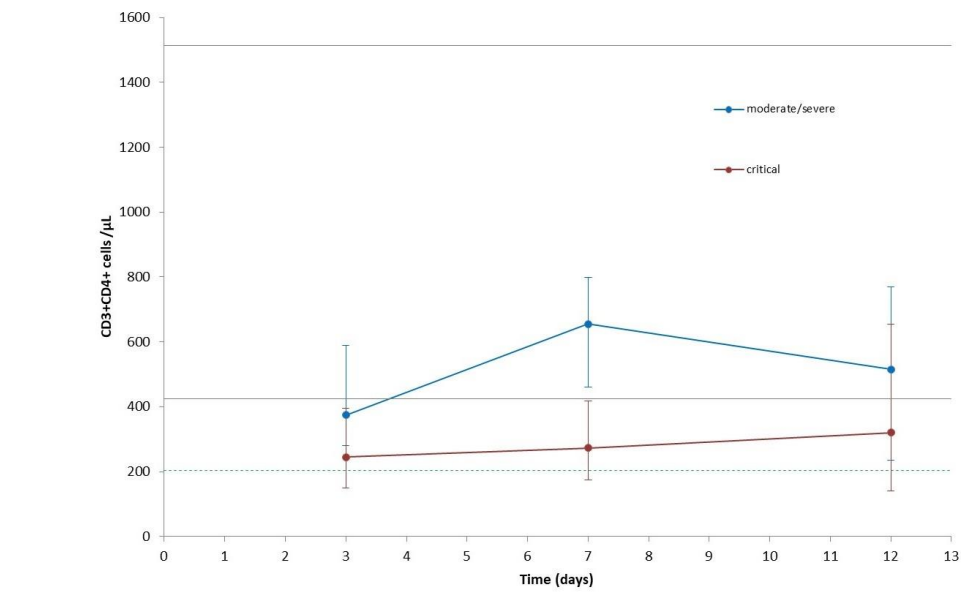

between groups \*

within moderate / severe course \*

**A**  
\*p<0.05

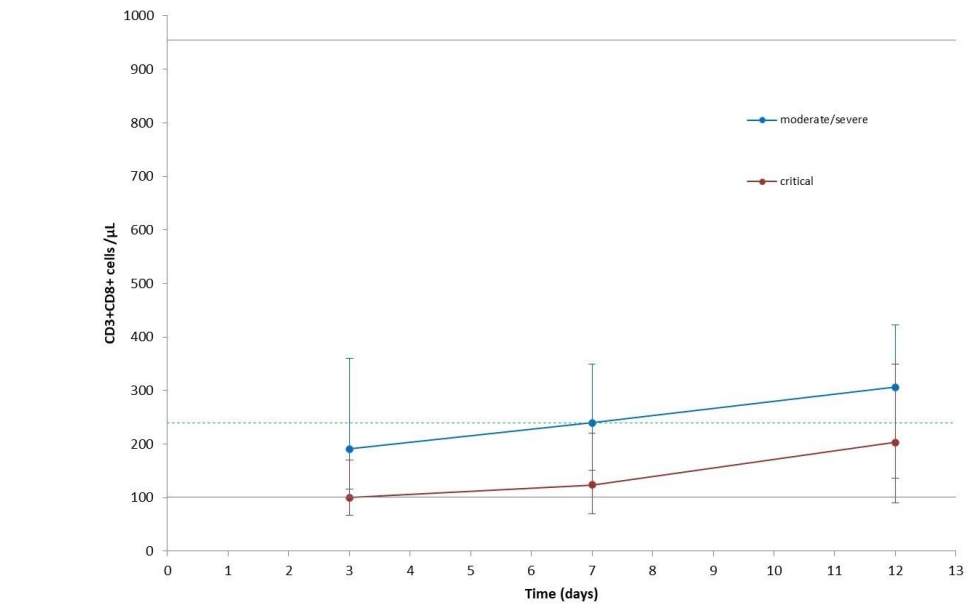

between groups \*

within critical course \*

**B**  
\*p<0.05

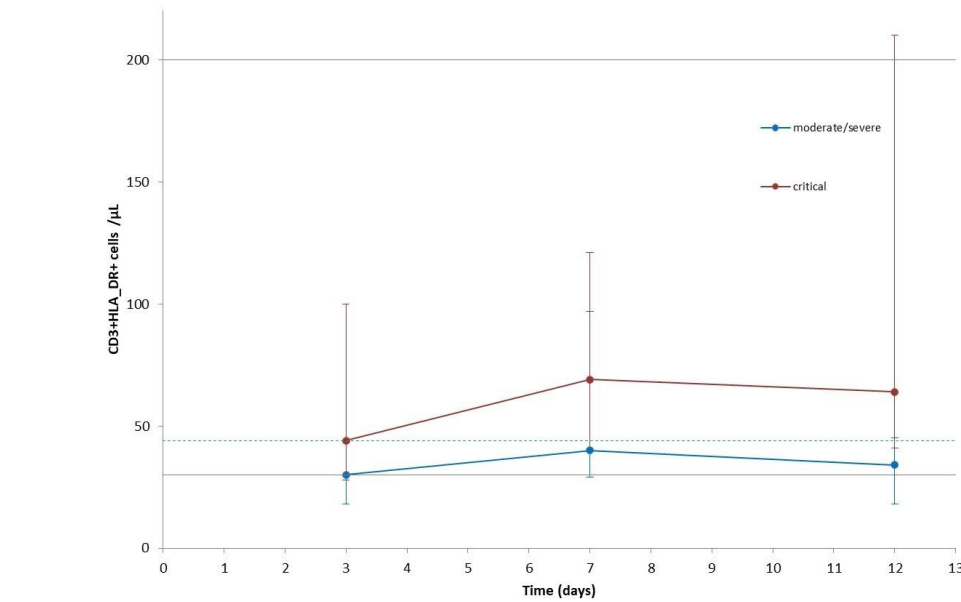

between groups \*

within critical course \*

**C**  
\*p<0.05

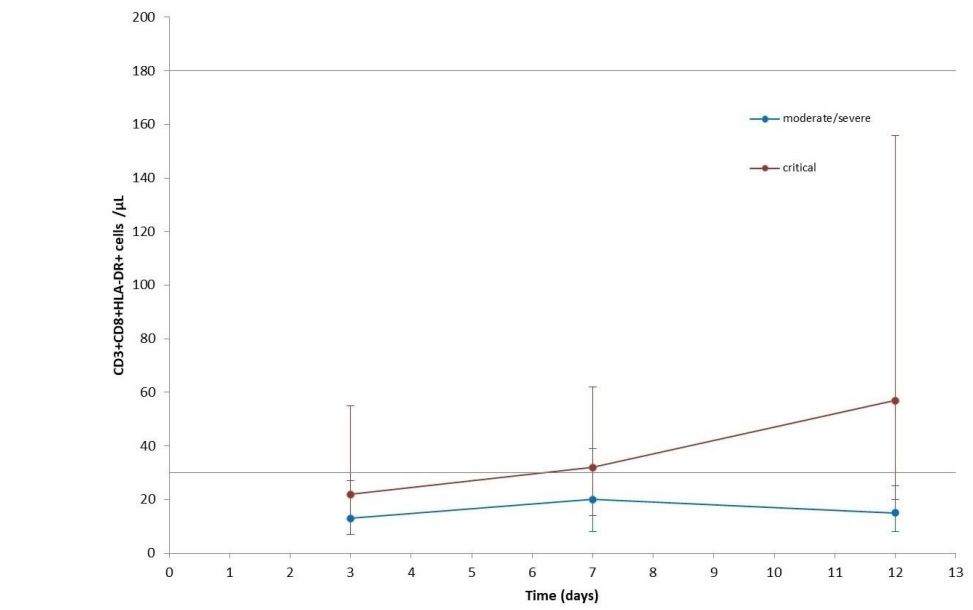

between groups \*

within critical course \*

**D**  
\*p<0.05

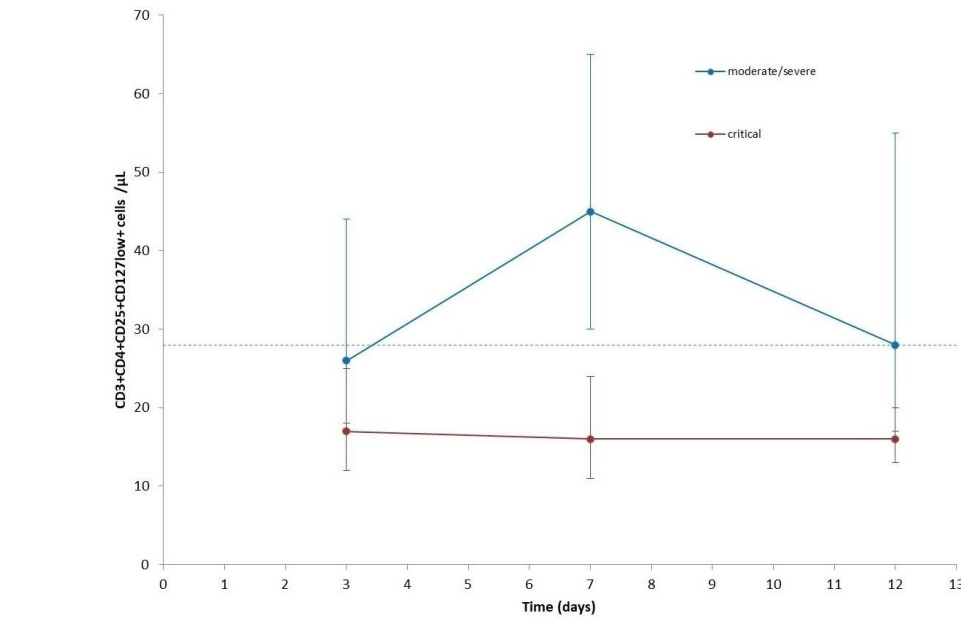

between groups \*

**E**  
\*p<0.05

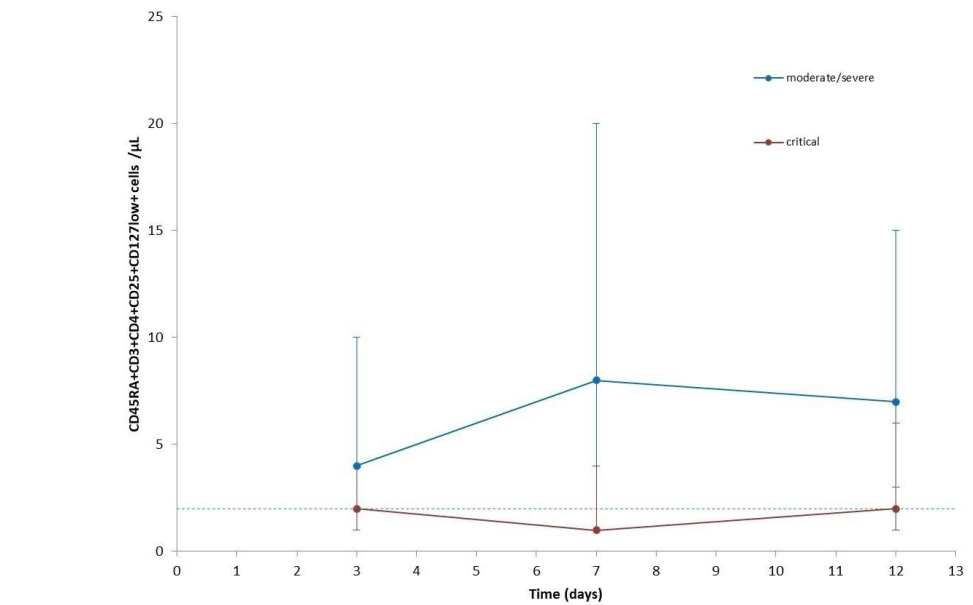

between groups \*

**F**  
\*p<0.05

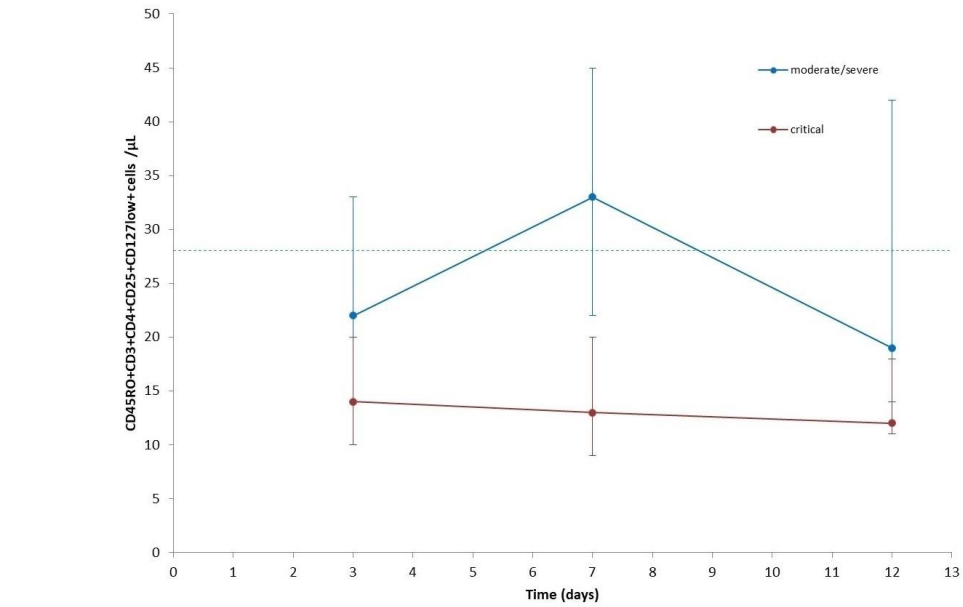

between groups

\*

\*

**G**  
\*p<0.05

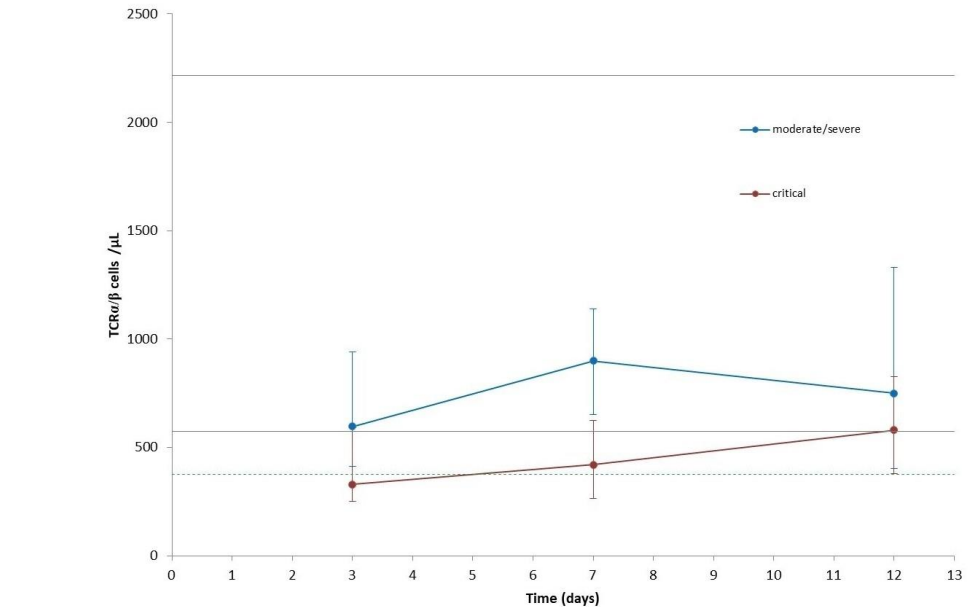

between groups

\*

\*

within critical course

\*

**H**  
\*p<0.05

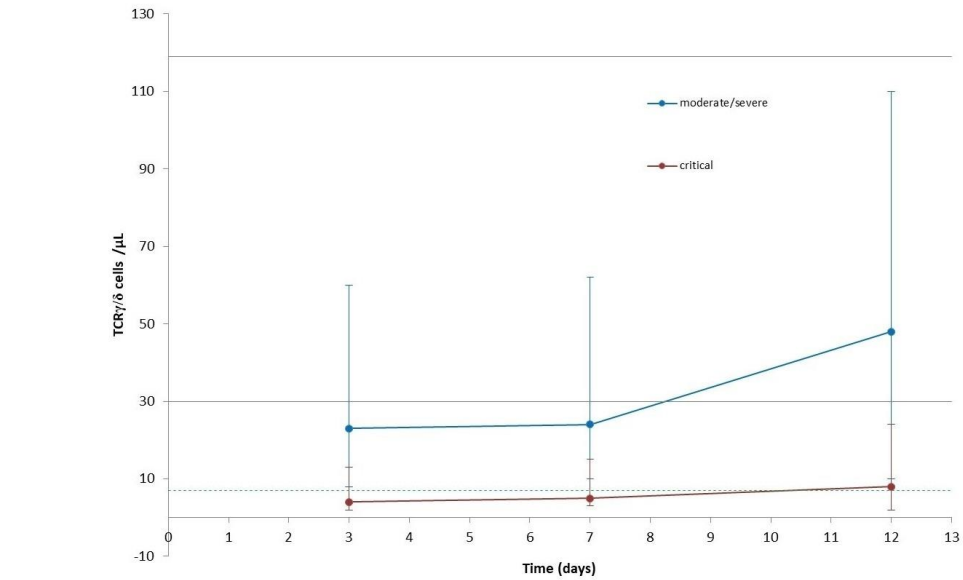

between groups

\*

\*

**I**  
\*p<0.05

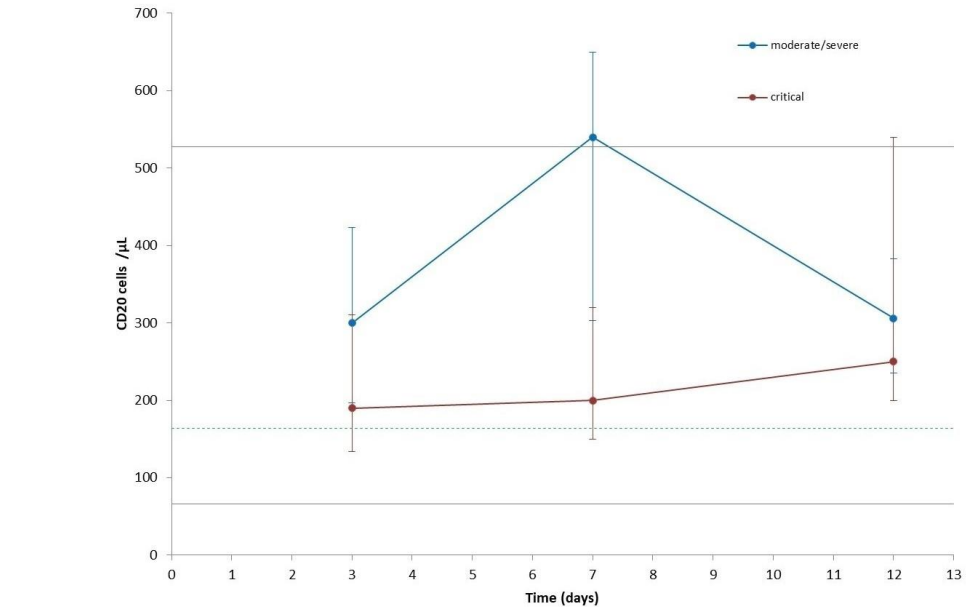

between groups

\*

\*

within critical course

\*

**J**  
\*p<0.05

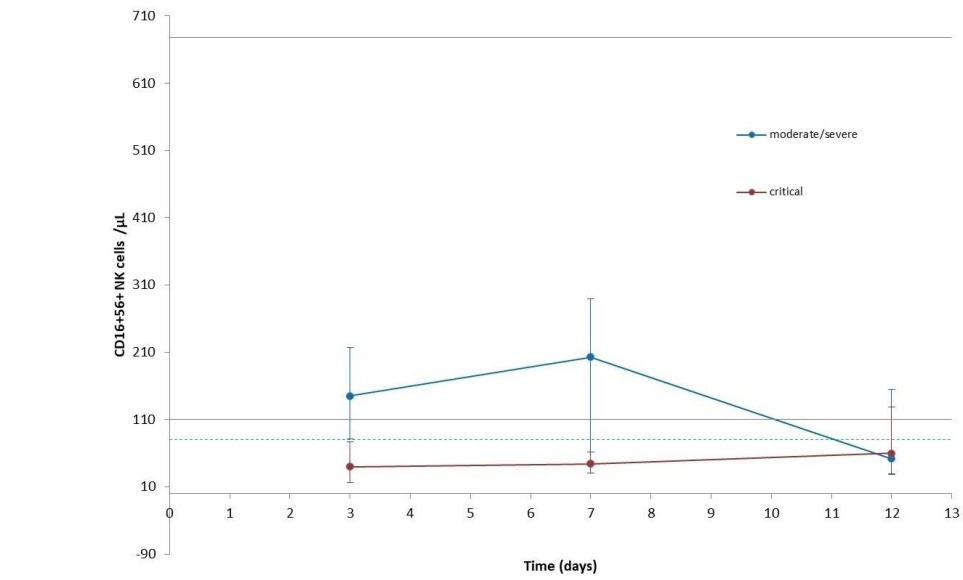

between groups

\*

\*

**K**  
\*p<0.05

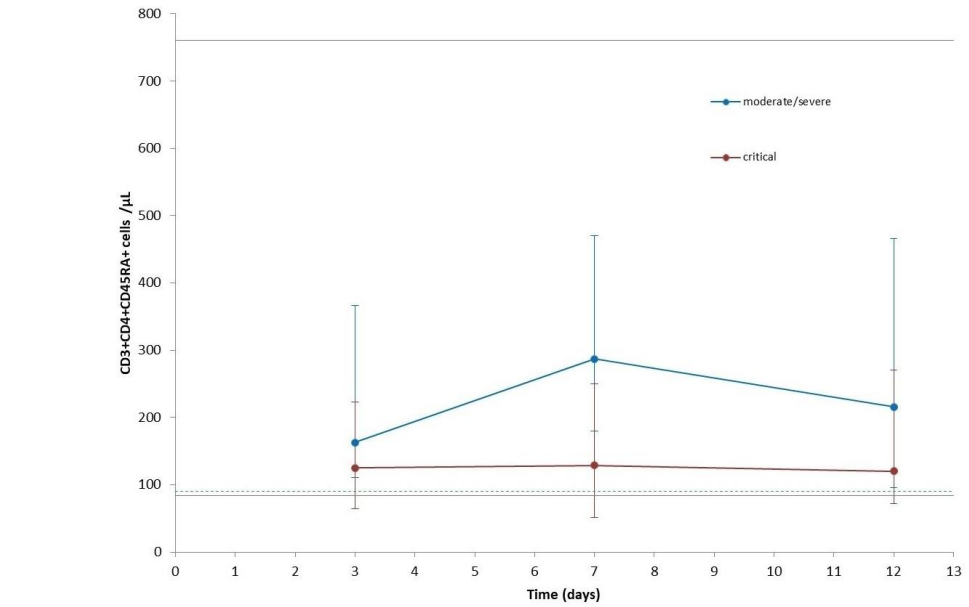

between groups

\*

\*

**L**  
\*p<0.05

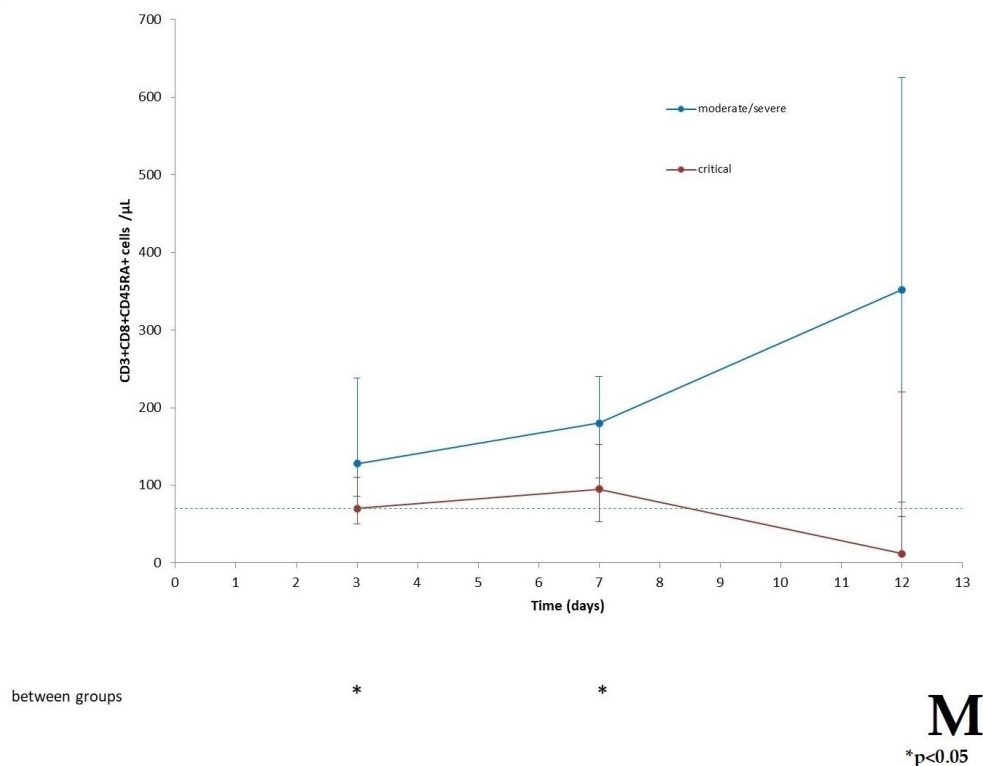

**Figure S3.** Changes in the counts of lymphocyte subpopulations during COVID-19.

- A** – Changes in Th cells (CD3+CD4+) during the course of SARS-CoV-2 infection in moderate/severe (blue line) versus critical (red line) COVID-19 patients. Statistical significance between studied groups and during the COVID-19 course in particular groups of patients marked with \*.
- B** – Changes in Ts cells (CD3+CD8+) during the course of SARS-CoV-2 infection in moderate/severe (blue line) versus critical (red line) COVID-19 patients. Statistical significance between studied groups and during the COVID-19 course in particular groups of patients marked with \*.
- C** – Changes in activated T cells (CD3+HLA-DR+) during the course of SARS-CoV-2 infection in moderate/severe (blue line) versus critical (red line) COVID-19 patients. Statistical significance between studied groups and during the COVID-19 course in particular groups of patients marked with \*.
- D** – Changes in activated Ts cells (CD3+CD8+HLA-DR+) during the course of SARS-CoV-2 infection in moderate/severe (blue line) versus critical (red line) COVID-19 patients. Statistical significance between studied groups and during the COVID-19 course in particular groups of patients marked with \*.
- E** – Changes in Treg cells (CD3+CD4+CD25+CD127low+) during the course of SARS-CoV-2 infection in moderate/severe (blue line) versus critical (red line) COVID-19 patients. Statistical significance between studied groups marked with \*.
- F** – Changes in naïve Treg cells (CD45RA+CD3+CD4+CD25+CD127low+) during the course of SARS-CoV-2 infection in moderate/severe (blue line) versus critical (red line) COVID-19 patients. Statistical significance between studied groups marked with \*.
- G** – Changes in induced Treg cells (CD45RO+CD3+CD4+CD25+CD127low+) during the course of SARS-CoV-2 infection in moderate/severe (blue line) versus critical (red line) COVID-19 patients. Statistical significance between studied groups marked with \*.
- H** – Changes in TCRα/β during the course of SARS-CoV-2 infection in moderate/severe (blue line) versus critical (red line) COVID-19 patients. Statistical significance between studied groups and during the COVID-19 course in particular groups of patients marked with \*.
- I** – Changes in TCRγ/δ during the course of SARS-CoV-2 infection in moderate/severe (blue line) versus critical (red line) COVID-19 patients. Statistical significance between studied groups marked with \*.
- J** – Changes in activated CD20+ B cells during the course of SARS-CoV-2 infection in moderate/severe (blue line) versus critical (red line) COVID-19 patients. Statistical significance between studied groups and during the COVID-19 course in particular groups of patients marked with \*.
- K** – Changes in CD16+CD56+ NK cells during the course of SARS-CoV-2 infection in moderate/severe (blue line) versus critical (red line) COVID-19 patients. Statistical significance between studied groups marked with \*.
- L** – Changes in naïve Th cells (CD3+CD4+CD45RA+) during the course of SARS-CoV-2 infection in moderate/severe (blue line) versus critical (red line) COVID-19 patients. Statistical significance between studied groups patients marked with \*.
- M** – Changes in naïve Ts cells (CD3+CD8+CD45RA+) during the course of SARS-CoV-2 infection in moderate/severe (blue line) versus critical (red line) COVID-19 patients. Statistical significance between studied groups marked with \*.
