# Supplementary material for: Immunosuppression as a Hallmark of Critical COVID-19: Prospective Study
Source: Cells. 2021 May 23;10(6):1293. doi: 10.3390/cells10061293 (PMC8224622; doi:10.3390/cells10061293)
Supplement: Supplementary file 1 [file cells-10-01293-s001.zip]

Archive with 4 entries (4 files):
- Supp fig 1.pdf
- Supp fig 2.pdf
- Supp fig 3.pdf
- Table S1.pdf
