# Supplementary figures and images for: Immunosuppression as a Hallmark of Critical COVID-19: Prospective Study
Source: MDPI journal article supplement (doi:10.3390/cells10061293), 2021-05-23

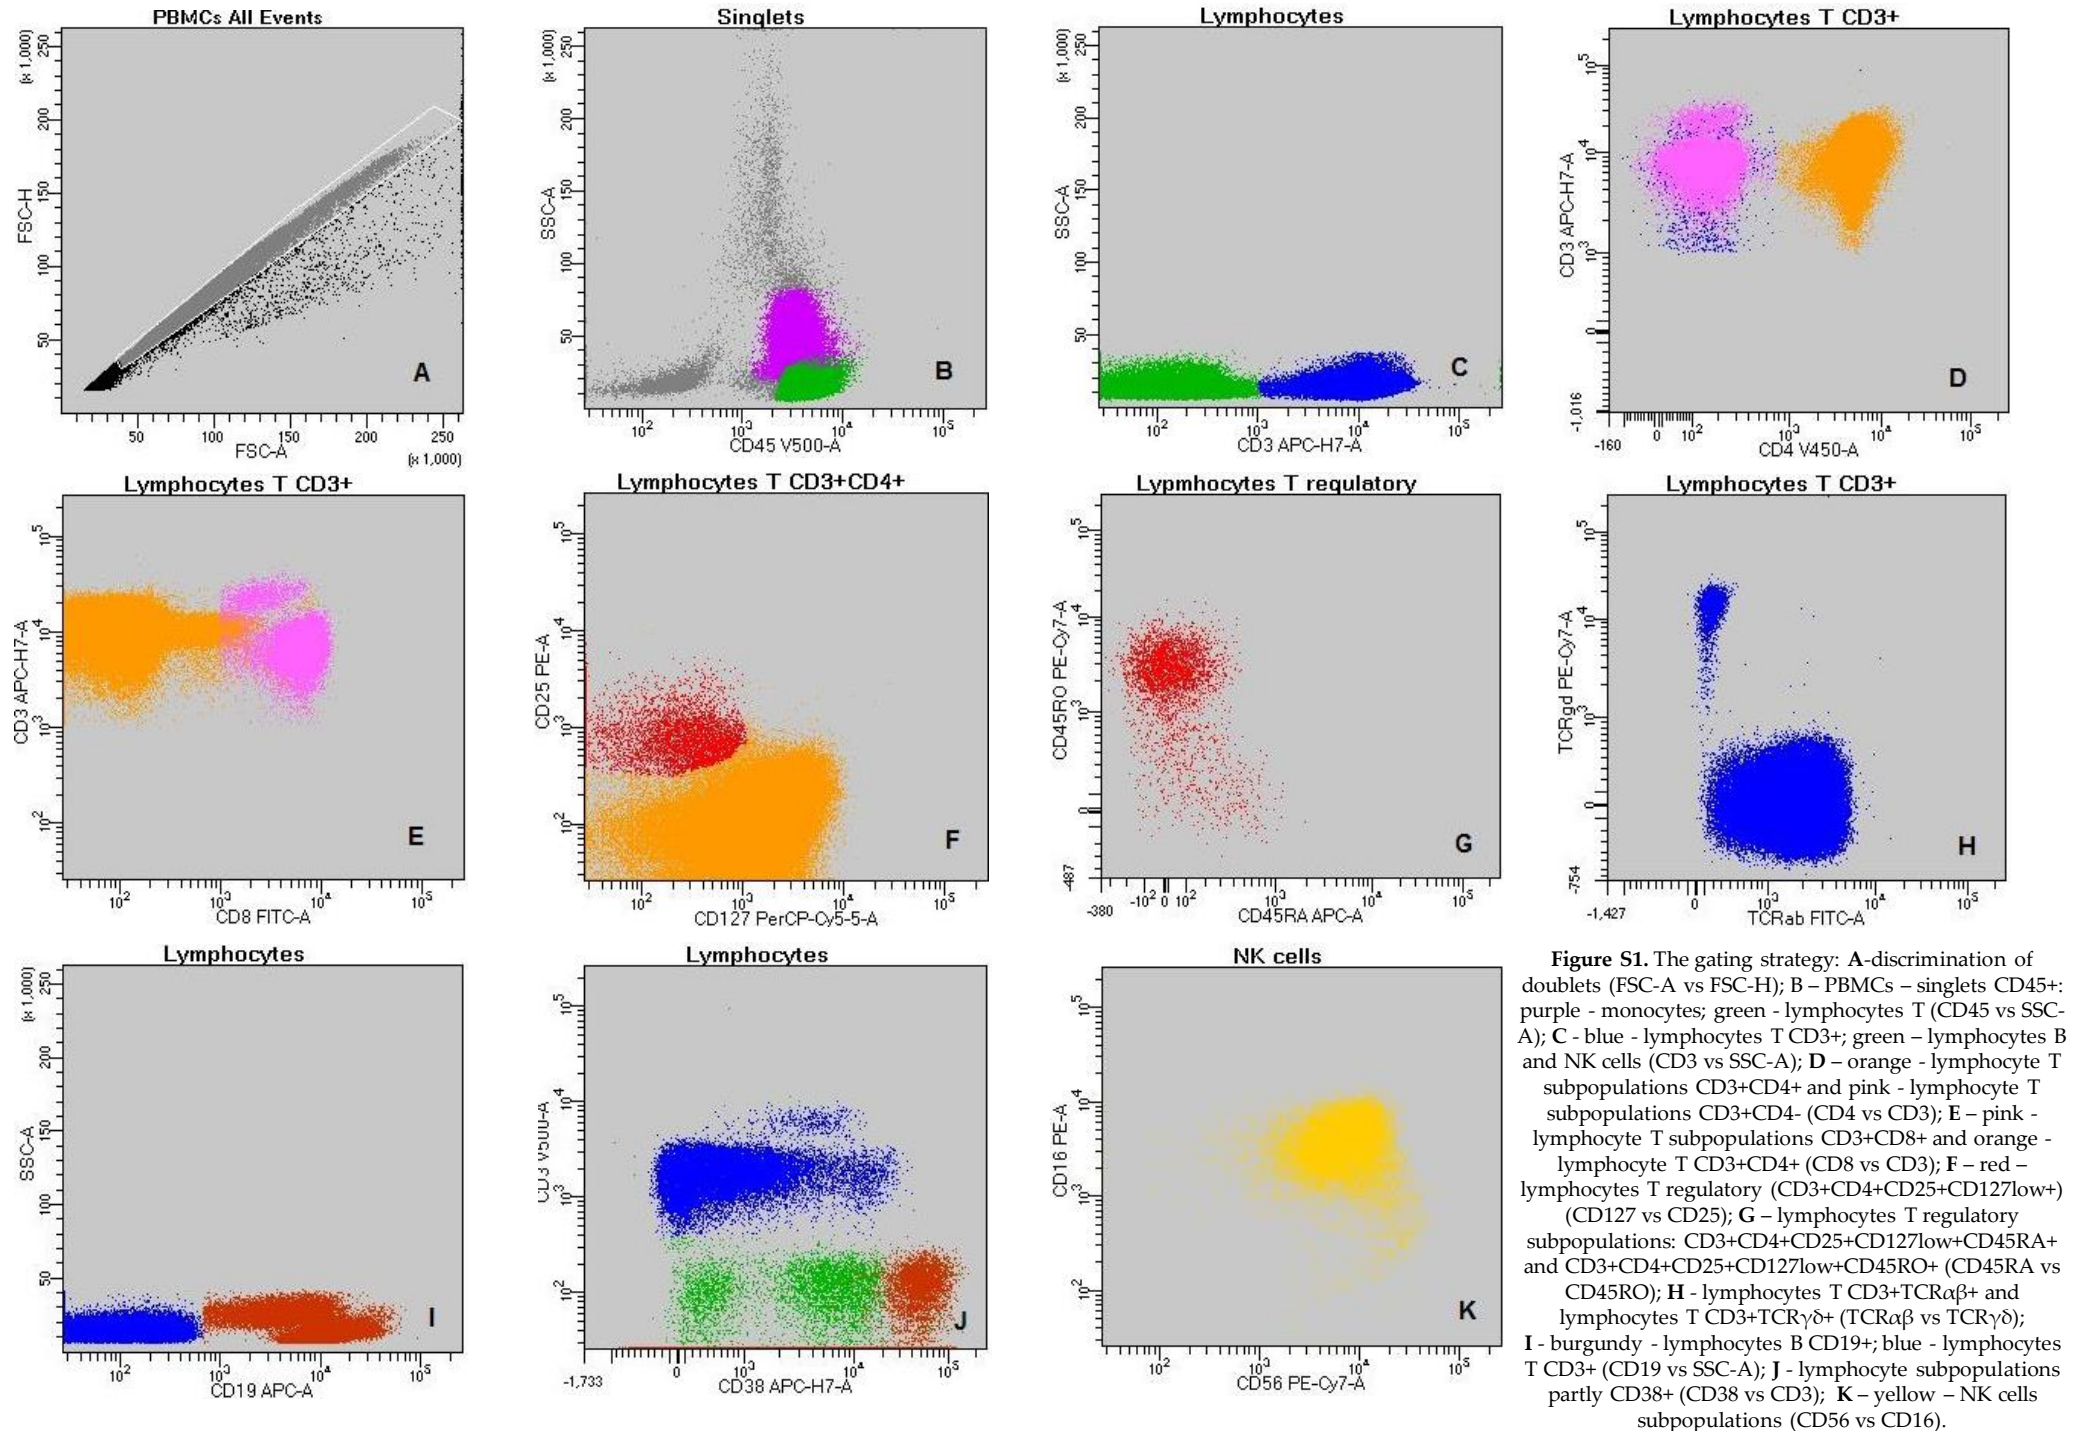

Supplement: s1 [file s1]

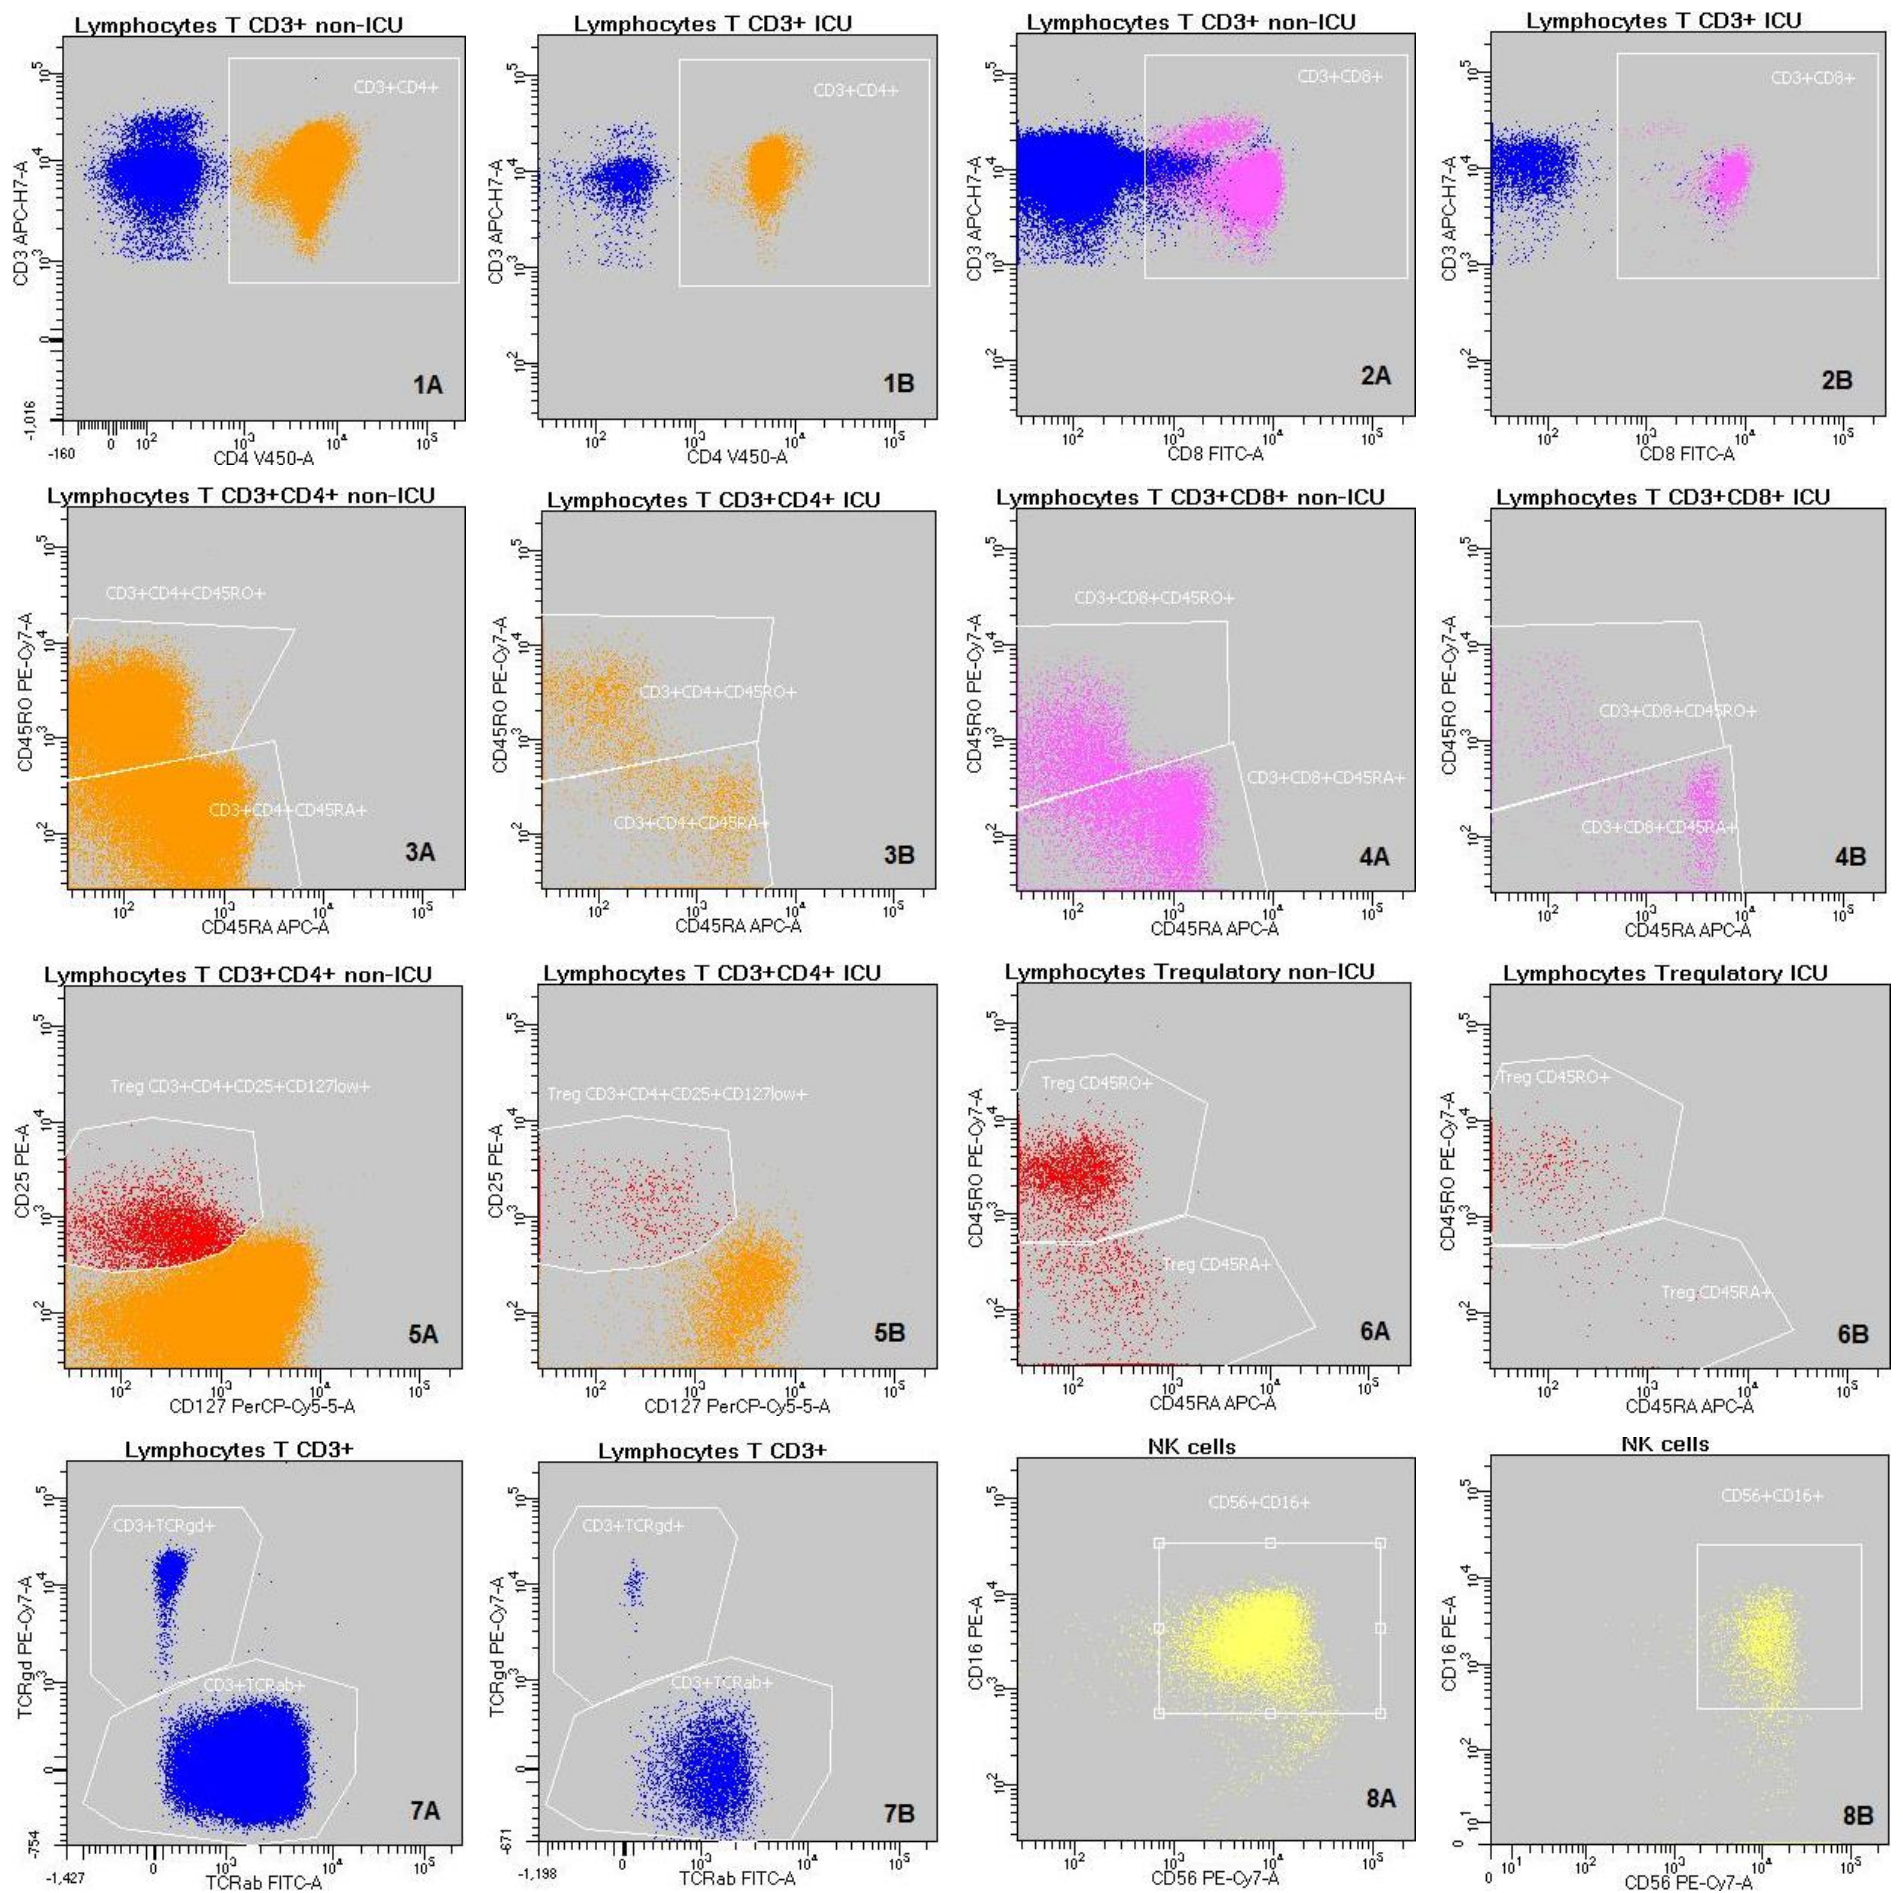

Supplement: s1 [file s1]
